# Supplementary material for: Implementation of Urban Solution for New Faculty Facilities within Spatial Historical and Cultural Units—A Case Study of Belgrade, Serbia
Source: MDPI journal article supplement (doi:10.3390/su15065590), 2023-03-22
Supplement: s1 [file s1]

## Supplementary material

Table S1. Review of researched literature by type and main topics (Chapter 2. Literature Review)

| REVIEW OF RESEARCHED LITERATURE BY TYPE AND MAIN TOPICS (Chapter 2. Literature Review) |                                                                                                                                                                                                         |                                                                                                                                                                                                                                                                                                                                                                                                                                                                                                                                                                                                                                                                                                                                                                                                                                                                                                                                                                                                                                                                                                                                                                                                                                                                                                                                                                                                                                                                                                                                                                                                                                                                                                                                                                                                                                                                                            |
|----------------------------------------------------------------------------------------|---------------------------------------------------------------------------------------------------------------------------------------------------------------------------------------------------------|--------------------------------------------------------------------------------------------------------------------------------------------------------------------------------------------------------------------------------------------------------------------------------------------------------------------------------------------------------------------------------------------------------------------------------------------------------------------------------------------------------------------------------------------------------------------------------------------------------------------------------------------------------------------------------------------------------------------------------------------------------------------------------------------------------------------------------------------------------------------------------------------------------------------------------------------------------------------------------------------------------------------------------------------------------------------------------------------------------------------------------------------------------------------------------------------------------------------------------------------------------------------------------------------------------------------------------------------------------------------------------------------------------------------------------------------------------------------------------------------------------------------------------------------------------------------------------------------------------------------------------------------------------------------------------------------------------------------------------------------------------------------------------------------------------------------------------------------------------------------------------------------|
| TYPE OF RESOURCE                                                                       | MAIN TOPICS REGARDING RESEARCH                                                                                                                                                                          | CORRESPONDING REFERENCES                                                                                                                                                                                                                                                                                                                                                                                                                                                                                                                                                                                                                                                                                                                                                                                                                                                                                                                                                                                                                                                                                                                                                                                                                                                                                                                                                                                                                                                                                                                                                                                                                                                                                                                                                                                                                                                                   |
| SCIENTIFIC PAPERS                                                                      | Design and implementation of standards for public higher education facilities, especially in relation to campuses.                                                                                      | <p>[2-8]</p> <ul style="list-style-type: none"> <li>• Gaines, Thomas A. The Campus as a Work of Art. Praeger Publishers, One Madison Avenue, New York, 1991, ISBN-0-275-93967-7</li> <li>• Dober, R. Campus Planning. Society for Coll. and Univ. Planning, MI, 1996, ISBN-0-9601608-1-7, <a href="https://doi.org/10.3992/jgb.11.1.108.1">https://doi.org/10.3992/jgb.11.1.108.1</a></li> <li>• Coulson, J., Roberts P., Taylor I. University Planning and Architecture: the search for perfection. London and New York: Routledge, 2015.</li> <li>• Coulson, J., Roberts P. and Taylor I. University Trends – Contemporary Campus Design. London and New York: Routledge, 2015.</li> <li>• Özkan, D. G., Alpak E. M., and Var M. Design and construction process in campus open spaces: A case study of Karadeniz Technical University. Urban Design International, 2017, 22.3, 236-252.</li> <li>• Hebbert, M. The Campus and the City: A Design Revolution Explained. Journal of Urban Design, 2018, 23 (6), 883–897.</li> <li>• Yaylali-Yildiz, B., Spierings, B. &amp; Çil, E. The spatial configuration and publicness of the university campus: interaction, discovery, and display on De Uithof in Utrecht. Urban Design International, 2022, 27, 80–94. <a href="https://doi.org/10.1057/s41289-020-00130-w">https://doi.org/10.1057/s41289-020-00130-w</a></li> </ul>                                                                                                                                                                                                                                                                                                                                                                                                                                                                                                           |
|                                                                                        | The importance of location in the struggle for competitiveness in the field of research.                                                                                                                | <p>[9,10]</p> <ul style="list-style-type: none"> <li>• Benneworth, P. and Hospers, G-J. Urban Competitiveness in the Knowledge Economy: universities as new planning animators. Oxford: Elsevier, 2007.</li> <li>• Ischinger, B., Puukka, J. Universities for Cities and Regions: Lessons from the OECD Reviews. Change, 2009, 41(3), 8–13. <a href="http://www.jstor.org/stable/20696146">http://www.jstor.org/stable/20696146</a></li> </ul>                                                                                                                                                                                                                                                                                                                                                                                                                                                                                                                                                                                                                                                                                                                                                                                                                                                                                                                                                                                                                                                                                                                                                                                                                                                                                                                                                                                                                                             |
|                                                                                        | Interaction between cities and universities, the importance of university city status in the social and economic sense, and social issues relating to the integration of students in a new environment. | <p>[11-18]</p> <ul style="list-style-type: none"> <li>• Bender, T. The University and the City, From Mediaeval Origins to the Present. New York: Oxford University Press, 1988.</li> <li>• Chatterton, P. University students and city centers—the formation of exclusive geographies: The case of Bristol, UK. Geoforum, 1999, 30.2, 117-133</li> <li>• Calhoun, C. The University and the Public Good. Thesis Eleven, 2006, 84 (1), 7–43.</li> <li>• Benneworth, P., Charles, D., Madanipour, A. Building Localized Interaction Between Universities and Cities Through University Spatial Development. European Planning Studies, 2010, Volume 18, Issue 10, 1611-1629, <a href="https://doi.org/10.1080/09654313.2010.5043">https://doi.org/10.1080/09654313.2010.5043</a></li> <li>• Forrant, R. Pulling Together in Lowell: The University and the Regional Development Process. European Planning Studies, 2001, Volume 9, Issue 5, 613-628, <a href="https://doi.org/10.1080/713666502">https://doi.org/10.1080/713666502</a></li> <li>• Benneworth, P., Herbst, M. The City as a Focus for Human Capital Migration: Toward a Dynamic Analysis of University Human Capital Contributions. European Planning Studies, 2015, Volume 23, Issue 3, pp. 454-474, <a href="https://doi.org/10.1080/09654313.2013.868869">https://doi.org/10.1080/09654313.2013.868869</a></li> <li>• Clauson, C., McKnight, J. Welcome to campus: Planning for diversity, inclusion, and equity. Planning for Higher Education, 2018, 47(1), 39.</li> <li>• Simoni, H., Georgoudaki, E. The University of Patras, Greece, its city, and international students: insights from multiple cartographic perspectives. European Planning Studies, 2020, Volume 28, Issue 2, pp. 213-233, <a href="https://doi.org/10.1080/09654313.2019.1632270">https://doi.org/10.1080/09654313.2019.1632270</a></li> </ul> |

|  |                                                                                                                                                        |                                                                                                                                                                                                                                                                                                                                                                                                                                                                                                                                                                                                                                                                                                                                                                                                                                                                                                                                                                                                                                                                                                                                                                                                                                                                                                                                                                                                                                                                                                                                   |
|--|--------------------------------------------------------------------------------------------------------------------------------------------------------|-----------------------------------------------------------------------------------------------------------------------------------------------------------------------------------------------------------------------------------------------------------------------------------------------------------------------------------------------------------------------------------------------------------------------------------------------------------------------------------------------------------------------------------------------------------------------------------------------------------------------------------------------------------------------------------------------------------------------------------------------------------------------------------------------------------------------------------------------------------------------------------------------------------------------------------------------------------------------------------------------------------------------------------------------------------------------------------------------------------------------------------------------------------------------------------------------------------------------------------------------------------------------------------------------------------------------------------------------------------------------------------------------------------------------------------------------------------------------------------------------------------------------------------|
|  | The theme of the surroundings having an impact on the quality of teaching and academic results achieved.                                               | <p>[19-21]</p> <ul style="list-style-type: none"> <li>• Leather, D. J., Marinho, R. D. Designing an Academic Building for 21st-Century Learning: A Dean's Guide. <i>Change</i>, <b>2009</b>, 41(3), 42–49. <a href="http://www.jstor.org/stable/20696151">http://www.jstor.org/stable/20696151</a></li> <li>• Muhammad, S., Sapri, M., Sipan, I. Academic Buildings and Their Influence on Students' Wellbeing in Higher Education Institutions. <i>Soc Indic Res</i> <b>2014</b>, 115, 1159–1178. <a href="https://doi.org/10.1007/s11205-013-0262-6">https://doi.org/10.1007/s11205-013-0262-6</a></li> <li>• Hoque, S., Weil, B. The Relationship Between Comfort Perceptions and Academic Performance in University Classroom Buildings. <i>Journal of Green Building</i>, <b>2016</b>, 11 (1), 1 Campus Planning.</li> </ul>                                                                                                                                                                                                                                                                                                                                                                                                                                                                                                                                                                                                                                                                                                 |
|  | The techniques for reconstructing and preserving historical buildings in which faculties are located.                                                  | <p>[22-24]</p> <p>Costanzo, S., Cusumano, A., Giaconia, C., Giaconia, G. Preservation of the artistic heritage within the seat of the Chancellorship of the University of Palermo: A proposal on a methodology regarding an environmental investigation according to Italian Standards, <i>Building and Environment</i>, <b>2006</b>, Volume 41, Issue 12, 1847-1859, ISSN 0360-1323, <a href="https://doi.org/10.1016/j.buildenv.2005.06.010">https://doi.org/10.1016/j.buildenv.2005.06.010</a></p> <p>Murzyn-Kupisz, M., Działek, J. Cultural heritage in building and enhancing social capital. <i>Journal of Cultural Heritage Management and Sustainable Development</i>, <b>2013</b>, Vol. 3 No. 1, 35-54. <a href="https://doi.org/10.1108/20441261311317392">https://doi.org/10.1108/20441261311317392</a></p> <p>Philokyprou, M. Adaptation of New University Uses in Old Buildings: The Case of Rehabilitation of Listed Buildings in Limassol Cyprus for University Purposes. <i>International Journal of Architectural Heritage</i>, <b>2014</b>, Vol. 8, Issue 5, 758- 782. <a href="https://doi.org/10.1080/15583058.2012.738282">https://doi.org/10.1080/15583058.2012.738282</a></p>                                                                                                                                                                                                                                                                                                                             |
|  | The issue of new technologies, and requirements for renewable energy and energy efficiency.                                                            | <p>[25]</p> <ul style="list-style-type: none"> <li>• Cabeza, L. F. Gracia, A., Pisello A. L. Integration of renewable technologies in historical and heritage buildings: A review. <i>Energy and Buildings</i>, <b>2018</b>, Volume 177, 96-111, ISSN 0378-7788, <a href="https://doi.org/10.1016/j.enbuild.2018.07.058">https://doi.org/10.1016/j.enbuild.2018.07.058</a></li> </ul>                                                                                                                                                                                                                                                                                                                                                                                                                                                                                                                                                                                                                                                                                                                                                                                                                                                                                                                                                                                                                                                                                                                                             |
|  | The urban renewal and the topic of constructing a new building for the university in the very center of the city.                                      | <p>[26,27,43]</p> <ul style="list-style-type: none"> <li>• Danilović Hristić, N., Gligorijević, Ž., Stefanović, N. Rekonstrukcija centralnih gradskih zona, na primeru gradova Lajpciga i Drezdena. <i>Arhitektura i urbanizam</i>, 2018, br. 46, 52-63. <a href="https://doi.org/10.5937/a-u0-16984">https://doi.org/10.5937/a-u0-16984</a> (in Serbian) Reconstruction of central city areas, using the example of the cities of Leipzig and Dresden</li> <li>• Danilović Hristić, N., Stefanović N. The results of urban renewal and reconstruction in cities which are in process of rehabilitation of identity, Case studies: Leipzig and Dresden. <i>Journal of Urban Culture Research (JUCR)</i>, 2020, Volume 20, January - June 2020, 97-111.</li> <li>• Lalošević, M. Modeli sprovođenja planskih rešenja objekata visokog obrazovanja na područjima prostorno kulturno-istorijskih celina – nova iskustva Beograda. <i>Naučno-stručna konferencija sa međunarodnim učešćem Udruženja urbanista Srbije "Letnja škola urbanizma i održivog razvoja"</i>, zbornik radova, 2022, 79-90, ISBN 978-86-84275-45-7. (in Serbian) Models of implementation of planning solutions for higher education facilities in areas of spatial cultural-historical units – new experiences of Belgrade. <i>Scientific conference with international participation of the Association of Urban Planners of Serbia "Summer School of Urbanism and Sustainable Development"</i>, proceedings, 2022, 79-90, ISBN 978-86-84275-45-7</li> </ul> |
|  | Architectural heritage, and the methodology for producing planning documents for revitalization, study of interpolating public educational facilities. | <p>[28-30, 44]</p> <ul style="list-style-type: none"> <li>• Kilic, S. E. Preservation Plan Application for the Historical City Centre, Kemeralti (Izmir, Turkey) <i>European Planning Studies</i>, 2008, Volume 16, Issue 2, 253-276, <a href="https://doi.org/10.1080/09654310701814595">https://doi.org/10.1080/09654310701814595</a></li> <li>• Doratli, N. Revitalizing historic urban quarters: A model for determining the most relevant strategic approach. <i>European Planning Studies</i>, 2005, Volume 13, Issue 5, 749-772, <a href="https://doi.org/10.1080/09654310500139558">https://doi.org/10.1080/09654310500139558</a></li> <li>• Janssen, J., Luiten, E., Renes, H., Stegmeijer, E. Heritage as a sector, factor and vector: conceptualizing the shifting relationship between heritage</li> </ul>                                                                                                                                                                                                                                                                                                                                                                                                                                                                                                                                                                                                                                                                                                            |

|                                          |                                                                                                                                                                                                                 |                                                                                                                                                                                                                                                                                                                                                                                                                                                                                                                                                                                                                                                                                                                                                                                                                                                                                                                                                                                                                                                                                                                                                                                                                                                                                                                                                                                                                                                                                                                                                                                                                                                                                                                                                                                                                                                                                                                                                                                                                                                             |
|------------------------------------------|-----------------------------------------------------------------------------------------------------------------------------------------------------------------------------------------------------------------|-------------------------------------------------------------------------------------------------------------------------------------------------------------------------------------------------------------------------------------------------------------------------------------------------------------------------------------------------------------------------------------------------------------------------------------------------------------------------------------------------------------------------------------------------------------------------------------------------------------------------------------------------------------------------------------------------------------------------------------------------------------------------------------------------------------------------------------------------------------------------------------------------------------------------------------------------------------------------------------------------------------------------------------------------------------------------------------------------------------------------------------------------------------------------------------------------------------------------------------------------------------------------------------------------------------------------------------------------------------------------------------------------------------------------------------------------------------------------------------------------------------------------------------------------------------------------------------------------------------------------------------------------------------------------------------------------------------------------------------------------------------------------------------------------------------------------------------------------------------------------------------------------------------------------------------------------------------------------------------------------------------------------------------------------------------|
|                                          |                                                                                                                                                                                                                 | <p>management and spatial planning. European Planning Studies, 2017, Volume 25, Issue 9, 1654-1672, <a href="https://doi.org/10.1080/09654313.2017.1329410">https://doi.org/10.1080/09654313.2017.1329410</a></p> <ul style="list-style-type: none"> <li>• Vukotić Lazar, M. and Danilović Hristić N. The Growth and Development of Belgrade in the Period from 1815 to 1910, Zbornik radova Filozofskog fakulteta u Prištini (sa sedištem u Kosovskoj Mitrovici), 2015, Vol. XLV (3), 51-80, ISSN 0354-3293</li> </ul>                                                                                                                                                                                                                                                                                                                                                                                                                                                                                                                                                                                                                                                                                                                                                                                                                                                                                                                                                                                                                                                                                                                                                                                                                                                                                                                                                                                                                                                                                                                                     |
|                                          | Importance of competitions for shaping cities, as a key method.                                                                                                                                                 | <p>[31]</p> <ul style="list-style-type: none"> <li>• Djerić, J., Lalošević, M., Konkursi i graditeljsko nasledje: odnos konkursa i urbanističkog plana. "Graditeljsko nasledje i urbanizam" - XI naučnostručna konferencija sa međunarodnim učešćem Zavoda za zaštitu spomenika kulture grada Beograda, zbornik radova, 2021, 360-373, ISBN 978-86-6100-000-3 (in Serbian) Competitions and architectural heritage: the relationship between the competition and the urban plan. "Building heritage and urbanism" – 11th scientific professional conference with the international participation of the Institute for the Protection of Cultural Monuments of the City of Belgrade, proceedings, 2021, 360-373, ISBN 978-86-6100-000-3.</li> </ul>                                                                                                                                                                                                                                                                                                                                                                                                                                                                                                                                                                                                                                                                                                                                                                                                                                                                                                                                                                                                                                                                                                                                                                                                                                                                                                          |
| <b>PROFESSIONAL AND CRITICAL REPORTS</b> | designing buildings for educational purposes or interpolating new university buildings within protected cultural-historical environments, highlighting the quality of the dialogue between the old and the new. | <p>[32]</p> <ul style="list-style-type: none"> <li>• A&amp;U 'Special Issue: New University Environments' (A&amp;U, Tokyo, February), 2021, 413, 7-119.</li> </ul>                                                                                                                                                                                                                                                                                                                                                                                                                                                                                                                                                                                                                                                                                                                                                                                                                                                                                                                                                                                                                                                                                                                                                                                                                                                                                                                                                                                                                                                                                                                                                                                                                                                                                                                                                                                                                                                                                          |
|                                          | Current, different examples from university cities                                                                                                                                                              | <p>[33-38]</p> <ul style="list-style-type: none"> <li>• New College Oxford. Our New Heritage <a href="https://www.new.ox.ac.uk/our-new-heritage">https://www.new.ox.ac.uk/our-new-heritage</a>, accessed 28 Jun 2022</li> <li>• e-architect. Catherine Hughes Building Somerville College, Oxford, 25 May 2022, <a href="https://www.e-architect.com/oxford/catherine-hughes-building-somerville-college-oxford/">https://www.e-architect.com/oxford/catherine-hughes-building-somerville-college-oxford/</a>, (accessed on 28 Jun 2022)</li> <li>• University of Cambridge. Sidgwick Site, <a href="https://www.sidgwick.sitedevelopments.cam.ac.uk/">https://www.sidgwick.sitedevelopments.cam.ac.uk/</a>, accessed 28 Jun 2022</li> <li>• ArchDaily. Sabrina Santos. "Danish Firms Unveil New University of Bergen Energy and Technology Building" 26 Oct 2016, <a href="https://www.archdaily.com/798070/arkitema-architects-unveils-new-university-of-bergen-energy-and-technology-building">https://www.archdaily.com/798070/arkitema-architects-unveils-new-university-of-bergen-energy-and-technology-building</a>, ISSN 0719-8884, (accessed on 29 Jun 2022)</li> <li>• Stir World. Mehta M.: University of Toronto's Daniels Building creates a dialogue between old and new, Oct 05, 2019, <a href="https://www.stirworld.com/see-features-university-of-torontos-daniels-building-creates-a-dialogue-between-old-and-new">https://www.stirworld.com/see-features-university-of-torontos-daniels-building-creates-a-dialogue-between-old-and-new</a>, (accessed on 29 Jun 2022)</li> <li>• Designboom. Stevens, P. Aires Mateus renovates 16th century church building for Portugal's University of Coimbra. Designboom, Jul 30, 2017, <a href="https://www.designboom.com/architecture/aires-mateus-trinity-college-renovation-university-of-coimbra-portugal-07-29-2017/">https://www.designboom.com/architecture/aires-mateus-trinity-college-renovation-university-of-coimbra-portugal-07-29-2017/</a>, (accessed on 29 Jun 2022)</li> </ul> |
|                                          | Reasons for locating faculty facilities and student accommodation outside the historical core.                                                                                                                  | <p>[39-40]</p> <ul style="list-style-type: none"> <li>• ArchDaily. Hall of Residence for Students – Coimbra University / Paula Santos Arquitectura [Residência de Estudantes da Universidade de Coimbra / Paula Santos Arquitectura] 20 Sep 2017, <a href="https://www.archdaily.com/874928/hall-of-residence-for-students-coimbra-university-paula-santos-arquitectura">https://www.archdaily.com/874928/hall-of-residence-for-students-coimbra-university-paula-santos-arquitectura</a> ISSN 0719-8884, (accessed on 29 Jun 2022)</li> <li>• AV Monografías. Aires M.: Student Dormitory, Coimbra, Nº 83, 20 para el XXI, Young European Architects (digital edition)</li> </ul>                                                                                                                                                                                                                                                                                                                                                                                                                                                                                                                                                                                                                                                                                                                                                                                                                                                                                                                                                                                                                                                                                                                                                                                                                                                                                                                                                                          |

|                                                |                                                                                                       |                                                                                                                                                                                      |
|------------------------------------------------|-------------------------------------------------------------------------------------------------------|--------------------------------------------------------------------------------------------------------------------------------------------------------------------------------------|
|                                                |                                                                                                       | <a href="https://arquitecturaviva.com/works/residencia-de-estudiantes-coimbra">https://arquitecturaviva.com/works/residencia-de-estudiantes-coimbra</a><br>(accessed on 29 Jun 2022) |
| <b>OTHER USED MATERIALS (Chapters 3 and 4)</b> | Legal framework (laws rulebooks, official decisions), urban plans, Jury reports, competition results. | [43-62]                                                                                                                                                                              |
